# Supplementary material
Source: Springer Nature journal article supplement (https://www.springermedizin.de/resource/supplementary/12916_2011_569_MOESM3_ESM.PDF/9598170)
Supplement: MOESM3 [file 9598170]

Figure S3

A

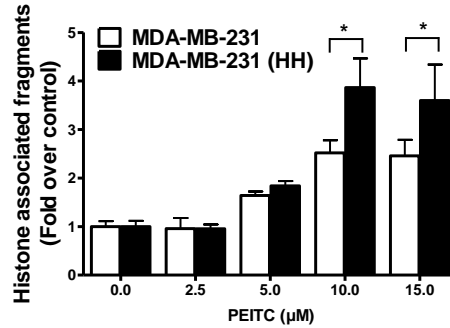

B

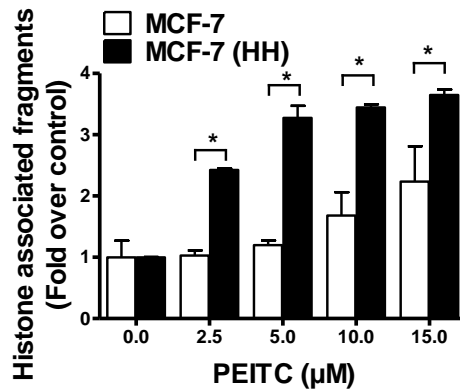

**Figure S3: Change in HER2 expression modulates the effect of PEITC.** (A) Comparative effect of PEITC treatment on MDA-MB-231 cells with stable overexpression of HER2 relative to parent cells. Cells were treated for 24 h with 10μM PEITC and apoptosis measured by ELISA cell death detection method in MDA-MB-231 parent cells and the cells with stable overexpression of HER2, after treatment with 10μM PEITC for 24 h. (B) Comparative effect of PEITC treatment in MCF-7 cells with stable overexpression of HER2 relative to the parent cells. Cells were treated for 24 h with 10μM PEITC and apoptosis measured by ELISA cell death detection method in MCF-7 parent cells and the cells with stable overexpression of HER2, after treatment with PEITC (10μM) for 24 h. The figures are representative of at least three independent experiments with 8 replicates. \*Statistically different compared with control ( $p < 0.05$ ).
